# Supplementary material for: Targeting protein aggregation using a cocoa-bean shell extract to reduce α-synuclein toxicity in models of Parkinson's disease
Source: PubMed Central journal article supplement — Curr Res Food Sci. 2024 Oct 24;9:100888. doi: 10.1016/j.crfs.2024.100888 (PMC11550773; doi:10.1016/j.crfs.2024.100888), 2024-10-24
Supplement: mmc1.pdf [file mmc1.pdf]

## Supplementary material

### Targeting protein aggregation using a cocoa-bean shell extract to reduce $\alpha$ -synuclein toxicity in models of Parkinson's disease

**Supplementary Figure S1.** (A) 600.17 MHz  $^1\text{H}$  NMR spectrum of cocoa bean shell extract solubilized in  $\text{D}_2\text{O}$  containing 50 mM phosphate buffer pH7.4 and 0.4 mM TSP as internal standard. (B) MS spectra of the metabolites reported in Table 3.

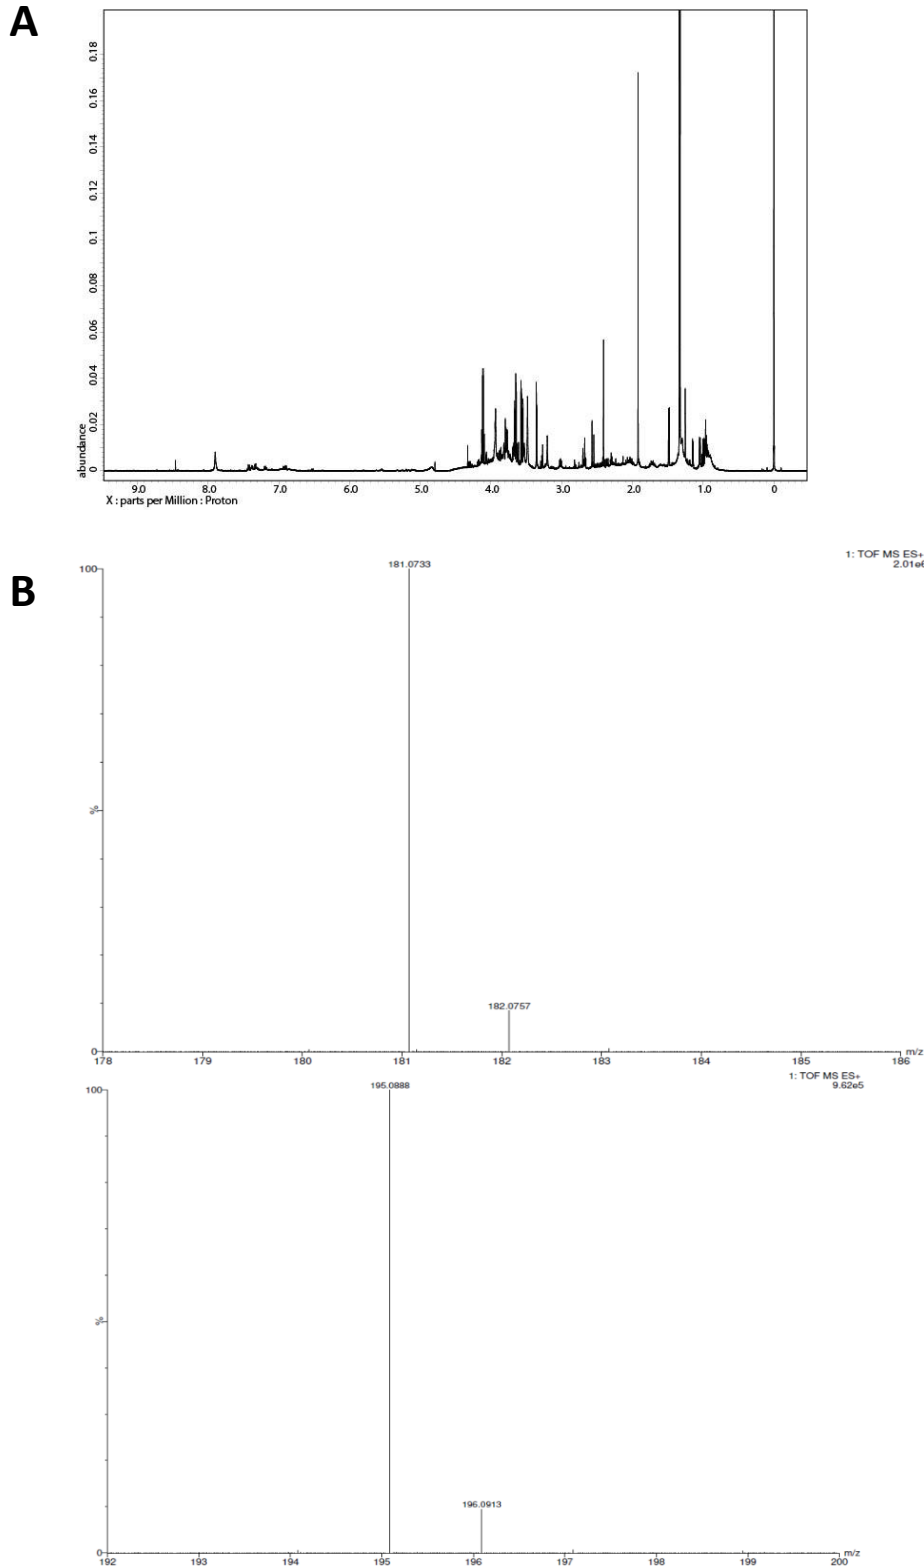

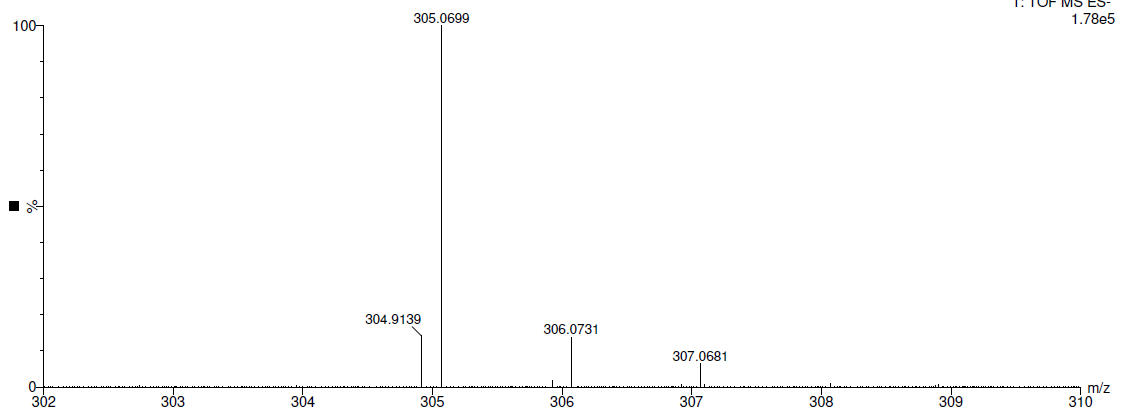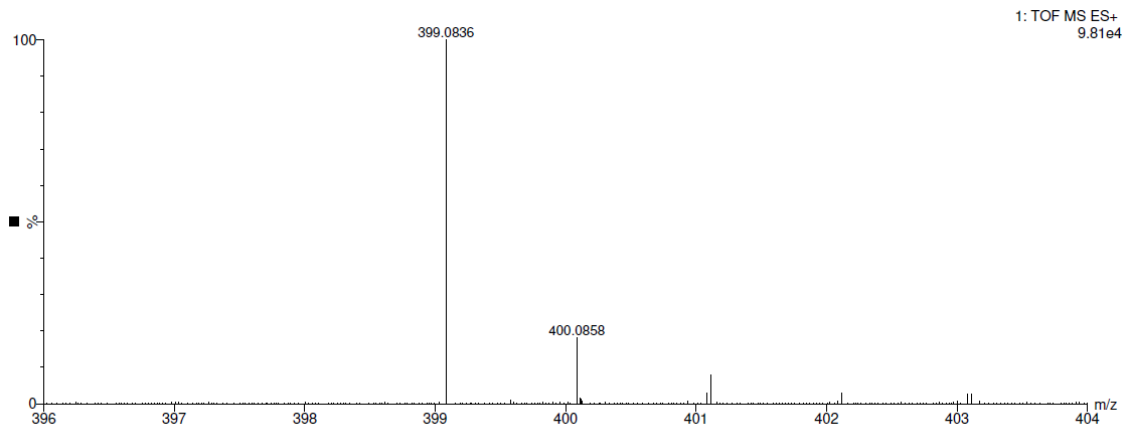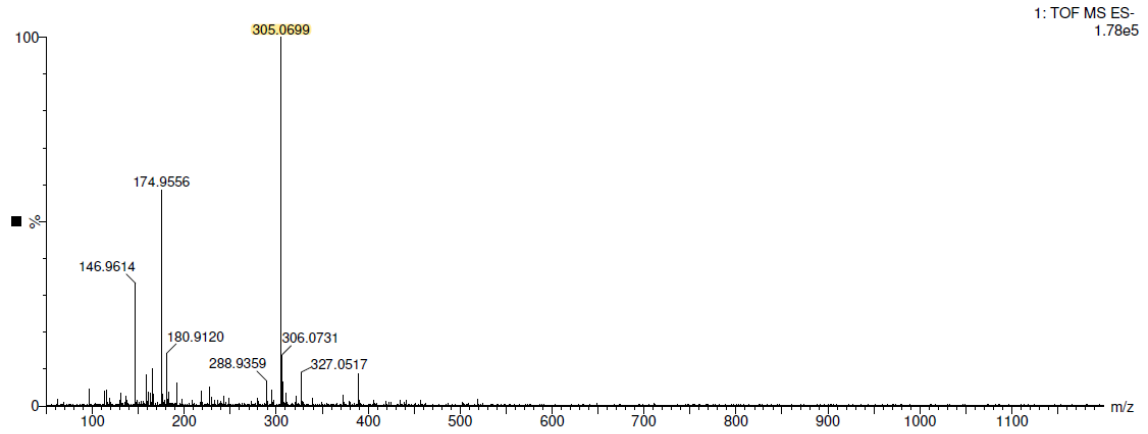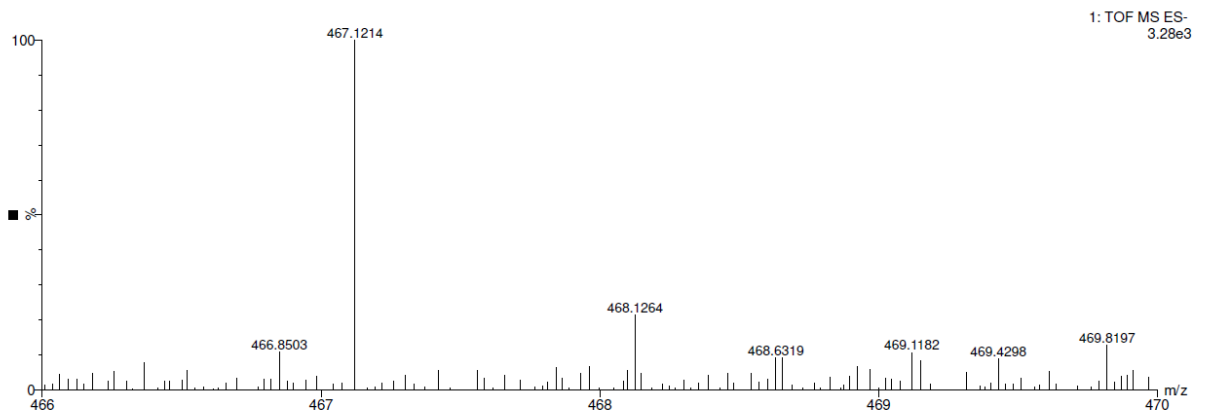

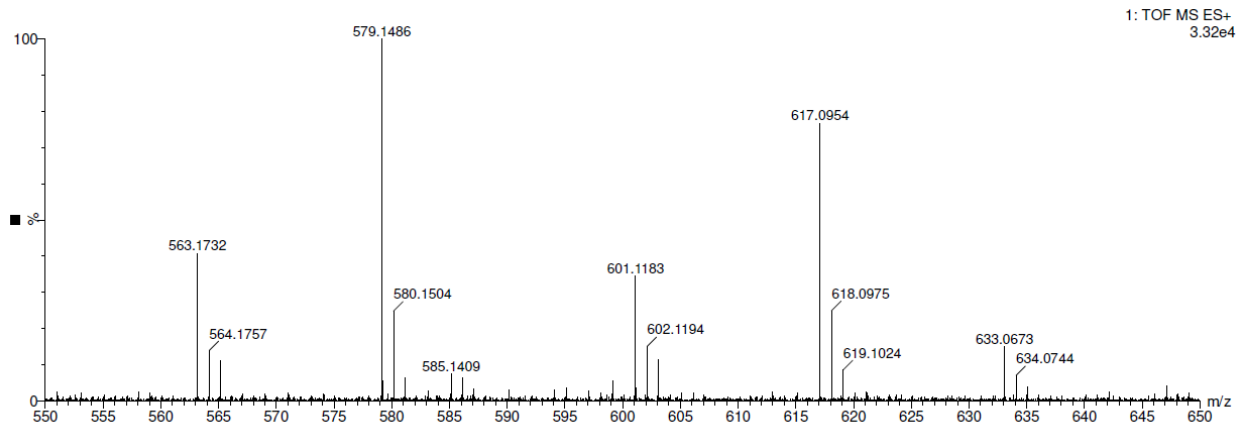

**Supplementary Figure S2.** (A)  $\alpha$ -syn aggregation process, followed by ThT fluorescence, in the absence (cnt) or presence of the 0.01 mg/mL of caffeine and theobromine. (B) The bioactivity of the CM5 sensor chip was determined by injecting positive (Ab anti- $\alpha$ -syn) and negative (Ab anti- $\alpha$ -syn33) controls onto immobilised  $\alpha$ -syn protein.

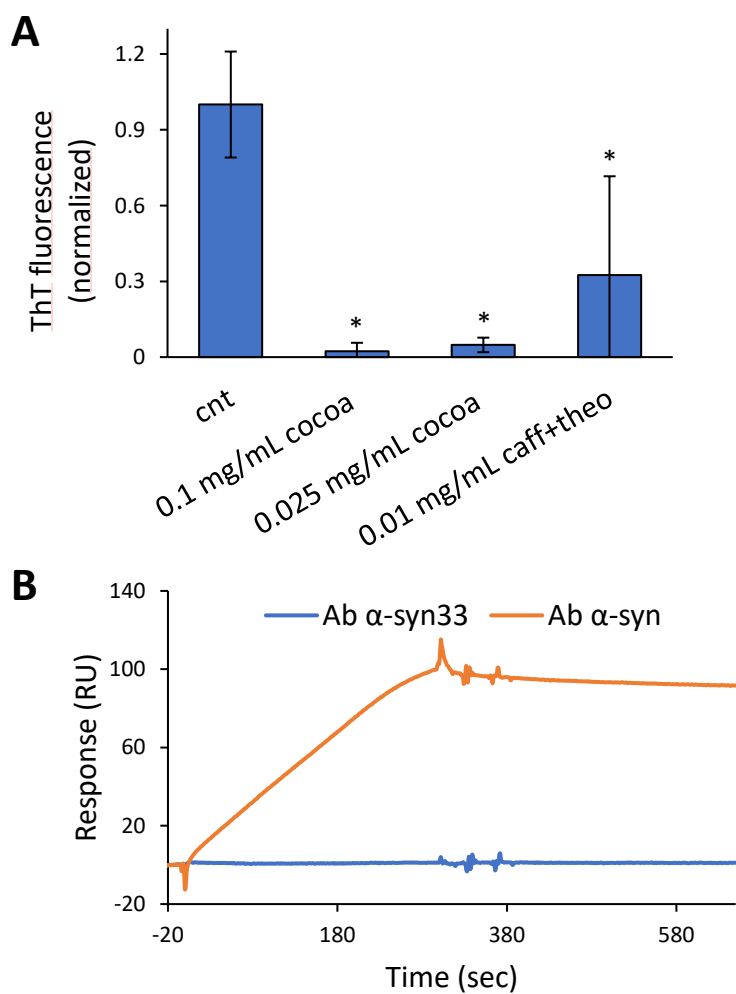

**Supplementary Table S1.** PM21-PM25 chemical compounds divided into functional groups. Drugs from plates PMs 21–25 divided into 6 groups, based on their structure and function: ions, cyclic compounds, organic compounds, chelators, antibiotics and nitrogen compounds. These 24 different chemical agents are presented in 4 different concentrations. The data presented for each drug concentration represent the ratio between the  $\gamma$ -maximum value of cells grown with the cocoa-shell treatment and the untreated control.

| Groups                   | Drugs                           | Concentration 1 | Concentration 2 | Concentration 3 | Concentration 4 |
|--------------------------|---------------------------------|-----------------|-----------------|-----------------|-----------------|
| Ions                     | Sodium dichromate               | 0.568           | 0.624           | 7.381           | 2.483           |
|                          | Sodium arsenate                 | 0.841           | 0.441           | 0.263           | 0.553           |
|                          | Sodium arsenite                 | 0.623           | 0.603           | 3.281           | 0.355           |
|                          | Sodium cyanate                  | 0.211           | 0.416           | 0.846           | 0.712           |
|                          | Sodium orthovanadate            | 0.628           | 8.260           | 3.682           | 0.995           |
|                          | Sodium selenate                 | 0.538           | 0.738           | 0.637           | 0.562           |
|                          | Sodium selenite                 | 0.655           | 0.655           | 0.698           | 0.990           |
|                          | Sodium cyanide                  | 0.440           | 4.112           | 1.891           | 14.762          |
|                          | Sodium thiosulfate              | 1.605           | 0.276           | 0.281           | 1.838           |
|                          | Sodium metasilicate             | 0.883           | 0.891           | 0.395           | 1.333           |
|                          | Sodium metaborate tetrahydrate  | 0.695           | 0.842           | 4.864           | 24.808          |
|                          | Sodium (meta)periodate          | 0.834           | 0.979           | 0.645           | 0.417           |
|                          | Sodium metavanadate             | 0.827           | 10.249          | 2.406           | 0.795           |
|                          | Sodium fluoride                 | 0.504           | 0.580           | 0.350           | 0.384           |
|                          | Potassium chromate              | 0.328           | 0.982           | 28.241          | 84.368          |
|                          | Copper (II) sulfate             | 0.747           | 20.745          | 5.493           | 4.990           |
|                          | Thallium(I) acetate             | 0.941           | 2.938           | 0.198           | 0.037           |
|                          | Cadmium chloride hydrate        | 61.403          | 12.128          | 13.669          | 7.381           |
|                          | Chromium(III) chloride          | 0.572           | 0.445           | 0.484           | 0.007           |
|                          | Cobalt(II) chloride hexahydrate | 0.842           | 0.775           | 1.138           | 24.255          |
|                          | Cupric chloride dihydrate       | 0.885           | 0.709           | 3.532           | 0.475           |
|                          | Manganese(II) chloride          | 0.833           | 0.780           | 1.465           | 2.444           |
|                          | Magnesium chloride              | 1.027           | 0.854           | 0.836           | 0.804           |
|                          | Nickel chloride                 | 0.591           | 0.645           | 0.698           | 0.979           |
|                          | Zinc chloride                   | 15.230          | 0.056           | 0.231           | 0.019           |
|                          | Benzethonium chloride           | 0.007           | 1.035           | 105.006         | 16.826          |
|                          | Protamine sulfate               | 0.562           | 0.580           | 0.617           | 1.352           |
|                          | Poly-L-lysine hydrochloride     | 0.611           | 3.562           | 3.156           | 0.527           |
| Cetylpyridinium chloride | 0.425                           | 86.487          | 135.200         | 18.796          |                 |
| Domiphen bromide         | 0.820                           | 0.906           | 112.782         | 93.627          |                 |

|                          |                                      |         |         |         |         |
|--------------------------|--------------------------------------|---------|---------|---------|---------|
|                          | Ammonium sulfate                     | 0.540   | 5.319   | 1.545   | 0.032   |
|                          | Lithium chloride                     | 0.943   | 0.747   | 30.688  | 12.906  |
|                          | Aluminum sulfate                     | 0.780   | 0.386   | 3.144   | 1.803   |
|                          | Dequalinium chloride                 | 1.332   | 100.927 | 85.825  | 131.658 |
|                          | Methyl viologen dichloride hydrate   | 4.242   | 0.089   | 3.603   | 0.076   |
|                          | Dodecyltrimethyl ammonium bromide    | 0.975   | 18.914  | 6.043   | 13.221  |
|                          | Alexidine                            | 0.652   | 71.948  | 20.141  | 26.238  |
|                          | Palladium(II) chloride               | 0.566   | 1.386   | 0.302   | 0.783   |
| <b>Cyclic Compounds</b>  | Promethazine                         | 0.577   | 6.096   | 1.007   | 0.028   |
|                          | Chlorpromazine hydrochloride         | 712.891 | 63.116  | 51.796  | 1.000   |
|                          | Cycloheximide                        | 0.762   | 0.732   | 0.488   | 0.528   |
|                          | Trifluoperazine                      | 6.548   | 3.298   | 1.187   | 1.732   |
|                          | Thioridazine hydrochloride           | 0.721   | 81.016  | 14.520  | 1.000   |
|                          | Fluconazole                          | 0.726   | 0.482   | 1.386   | 0.240   |
|                          | Tamoxifen                            | 0.680   | 3.988   | 1.103   | 2.973   |
|                          | Miconazole nitrate                   | 2.408   | 3.024   | 0.661   | 0.622   |
|                          | Tetrazolium Violet                   | 67.922  | 25.351  | 8.318   | 5.290   |
|                          | Amitriptyline hydrochloride          | 94.348  | 16.094  | 1.000   | 7.009   |
|                          | Zaragozic acid A                     | 0.859   | 0.621   | 0.441   | 0.027   |
|                          | Berberine chloride                   | 0.535   | 0.534   | 0.768   | 2.818   |
| <b>Organic Compounds</b> | L-Aspartic acid $\beta$ -hydroxamate | 0.527   | 0.272   | 1.930   | 0.192   |
|                          | L-Glutamic acid g-hydroxamate        | 0.920   | 0.325   | 1.284   | 14.924  |
|                          | L-Arginine hydroxamate               | 0.273   | 0.766   | 1.242   | 97.123  |
|                          | Glycine hydroxamate                  | 0.900   | 125.862 | 130.341 | 57.425  |
|                          | D,L-Serine hydroxamate               | 0.710   | 4.095   | 0.980   | 0.779   |
|                          | D-Serine                             | 0.921   | 0.789   | 1.847   | 0.423   |
|                          | Thialysine                           | 0.641   | 0.379   | 0.094   | 0.616   |
|                          | 5-Fluorocytosine                     | 22.995  | 9.564   | 8.840   | 10.070  |
|                          | 5-Fluorouracil                       | 0.434   | 0.590   | 0.082   | 0.017   |
|                          | Propiconazole                        | 1.019   | 0.945   | 1.717   | 7.836   |
|                          | Sodium benzoate                      | 0.658   | 0.595   | 0.415   | 0.295   |
|                          | Hydroxyurea                          | 0.927   | 0.974   | 1.464   | 34.670  |
|                          | Azaserine                            | 0.994   | 26.104  | 11.241  | 8.007   |
|                          | Urea hydrogen peroxide               | 0.882   | 0.707   | 0.835   | 0.647   |
|                          | Succinic acid                        | 0.589   | 0.749   | 4.131   | 6.484   |
|                          | Malic acid                           | 0.812   | 0.747   | 116.117 | 11.930  |
|                          | Tartaric acid                        | 0.716   | 0.863   | 1.350   | 0.473   |
| Fumaric acid             | 0.556                                | 0.729   | 0.392   | 0.029   |         |

|                    |                                  |        |         |         |        |
|--------------------|----------------------------------|--------|---------|---------|--------|
|                    | Cinnamic acid                    | 0.728  | 0.603   | 0.821   | 0.256  |
|                    | Fluorodeoxyuridine               | 0.739  | 0.884   | 0.645   | 0.026  |
|                    | Sodium caprylate                 | 0.669  | 0.000   | 0.785   | 0.380  |
|                    | Sodium salicylate                | 0.871  | 1.452   | 1.116   | 1.159  |
|                    | Glycine hydrochloride            | 0.305  | 0.768   | 6.428   | 1.666  |
|                    | Caffeine                         | 0.581  | 0.585   | -0.028  | 0.407  |
|                    | Chloroalanine hydrochloride      | 0.639  | 1.207   | 1.000   | 24.164 |
|                    | 2-Deoxy-D-glucose                | 0.934  | 0.049   | 0.694   | 0.026  |
|                    | Clomiphene citrate               | 0.744  | 10.841  | 1.258   | 0.524  |
|                    | Ibuprofen                        | 0.575  | 0.527   | 0.009   | 0.009  |
|                    | Chloroquine                      | 0.904  | 1.952   | 95.179  | 1.149  |
|                    | Guanidine hydrochloride          | 0.561  | 0.472   | 16.468  | 15.944 |
|                    | Myclobutanil                     | 0.881  | 0.671   | 0.911   | 0.120  |
|                    | Niaproof                         | 0.204  | 0.327   | 0.013   | 1.221  |
|                    | Polymyxin B                      | 0.681  | 0.808   | 131.563 | 31.240 |
|                    | Miltefosine                      | 0.764  | 0.537   | 70.027  | 80.424 |
|                    | FCCP                             | 0.771  | 0.722   | 0.610   | 0.017  |
|                    | CCCP                             | 0.536  | 0.699   | 1.534   | 2.951  |
|                    | Triclosan                        | 0.536  | 19.741  | 1.574   | 14.318 |
| <b>Chelators</b>   | 1-Hydroxypyridine-2-thione       | 0.659  | 0.714   | 0.873   | 0.327  |
|                    | EDTA                             | 0.060  | 139.272 | 131.186 | 59.347 |
|                    | BAPTA                            | 0.694  | 0.755   | 108.205 | 2.685  |
|                    | EGTA                             | 3.324  | 5.524   | 1.920   | 7.977  |
|                    | Sodium pyrophosphate decahydrate | 0.898  | 0.005   | 0.038   | 0.501  |
|                    | Benzamidine                      | 0.430  | 14.517  | 13.875  | 1.269  |
|                    | 2,2'-Dipyridyl                   | 0.936  | 0.806   | 0.614   | 17.780 |
| <b>Antibiotics</b> | Nystatin                         | 0.601  | 0.428   | 17.862  | 12.708 |
|                    | D-Cycloserine                    | 8.931  | 3.427   | 1.049   | 1.153  |
|                    | Apramycin sulfate                | 0.322  | 0.680   | 0.980   | 1.703  |
|                    | Blasticidin hydrochloride        | 0.185  | 0.982   | 0.617   | 0.186  |
|                    | Chlortetracycline hydrochloride  | 0.570  | 0.962   | 3.965   | 0.878  |
|                    | Kanamycin monosulfate            | 0.804  | 0.394   | 0.177   | 1.119  |
|                    | Paromomycin                      | 9.092  | 3.369   | 2.545   | 1.473  |
|                    | Isoniazid                        | 0.664  | 2.075   | 10.869  | 1.815  |
|                    | Bleomycin                        | 0.859  | 128.058 | 60.042  | 3.171  |
|                    | Doxycycline hyclate              | 0.748  | 0.129   | 0.921   | 2.946  |
|                    | Tobramycin                       | 0.652  | 34.116  | 24.032  | 3.491  |
|                    | Hygromycin B                     | 1.575  | 20.553  | 20.219  | 28.204 |
|                    | Neomycin                         | 38.855 | 117.128 | 36.588  | 14.900 |
|                    | Pentamidine isethionate          | 0.770  | 1.049   | 0.030   | 2.279  |

|                    |                             |       |       |         |        |
|--------------------|-----------------------------|-------|-------|---------|--------|
| Nitrogen Compounds | 6-Azauracil                 | 0.786 | 0.629 | 0.935   | 1.873  |
|                    | Diamide                     | 0.419 | 0.623 | 0.000   | 2.044  |
|                    | Thiourea                    | 0.088 | 0.604 | 12.648  | 0.425  |
|                    | 4-Aminopyridine             | 0.131 | 0.353 | 29.848  | 37.486 |
|                    | Sodium azide                | 0.477 | 0.853 | 0.278   | 25.055 |
|                    | Sodium nitrite              | 0.748 | 0.898 | 1.132   | 1.314  |
|                    | Cisplatin                   | 8.866 | 9.519 | 4.374   | 11.550 |
|                    | Aminacrine                  | 1.193 | 7.287 | 1.707   | 2.750  |
|                    | 3-Amino-1,2,4-triazole      | 0.588 | 0.632 | 143.026 | 39.586 |
|                    | 4-Nitroquinoline-N-oxide    | 0.860 | 0.737 | 0.725   | 0.984  |
|                    | Hydroxylamine hydrochloride | 0.861 | 0.698 | 1.060   | 0.001  |
|                    | Compound 48/80              | 0.386 | 2.525 | 136.429 | 61.358 |

**Supplementary Table S2.** Compounds towards which cocoa-shell extract alters sensitivity, reported in Fig. 5.

Compounds were selected when the fold change (ratio between  $\gamma$ -maximum value of CBSE treated vs control cells) was  $>5$  or  $<0.2$  in at least three concentrations. Drugs are categorised according to their structure and function, and their specific effects are described alongside the pertinent reference.

| Groups | Drugs                             | Effects                                                                                                                 | References            |
|--------|-----------------------------------|-------------------------------------------------------------------------------------------------------------------------|-----------------------|
| Ions   | Dodecyltrimethyl ammonium bromide | ability to promote disaggregation of the fibrillar assembly ( <i>in vitro</i> )                                         | (Pandey et al., 2013) |
|        | Cadmium chloride hydrate          | autophagy inducer (in hepatocytes)                                                                                      | (Niture et al., 2021) |
|        | Cetylpyridinium chloride          | antimicrobial effect (drug dose-dependently inhibit mitochondrial complex 1 and potent and dose-dependent AMPK inducer) | (Allen et al., 2020)  |
|        | Dequalinium chloride              | act as an inducer and/or stabilizer of the protofibrils of $\alpha$ -synuclein ( <i>in vitro</i> )                      | (Lee et al., 2006)    |
|        | Alexidine                         | antimicrobial effect                                                                                                    | (Kim et al., 2013)    |

|                   |                             |                                                                                                                                           |                          |
|-------------------|-----------------------------|-------------------------------------------------------------------------------------------------------------------------------------------|--------------------------|
| Chelators         | EDTA                        | autophagy inducer (in <i>A. fumigatus</i> )                                                                                               | (Richie et al., 2007)    |
| organic compounds | Glycine hydroxamate         | autophagy inhibitor (in neuron through the AMPK pathway both <i>in vitro</i> and <i>in vivo</i> )                                         | (Cai et al., 2019)       |
|                   | Azaserine                   | antioxidant effect                                                                                                                        | (Rajapakse et al., 2009) |
| Cyclic Compounds  | 5-Fluorocytosine            | autophagy inducer (in BGC-823 cells)                                                                                                      | (X.-X. He et al., 2018)  |
|                   | Tetrazolium Violet          | apoptotic inducer (antitumor effect in Human Lung Cancer A549 cells)                                                                      | (Zhang et al., 2012)     |
|                   | Amitriptyline hydrochloride | autophagy inhibitor (not block the beginning of autophagy, block its turnover, via inhibiting autophagosome maturation in neuronal cells) | (Kwon et al., 2020)      |
| antibiotics       | Hygromycin B                | inhibit growth (in <i>S. cerevisiae</i> )                                                                                                 | (Kaster et al., 1984)    |
|                   | Bleomycin                   | autophagy inducer (in idiopathic pulmonary fibrosis)                                                                                      | (Yue et al., 2022)       |
|                   | Neomycin                    | autophagy inducer (in both cochlear HCs and HEIOC-1 cells after neomycin injury)                                                          | (Z. He et al., 2017)     |

### Supplementary References

Allen, S. A., Datta, S., Sandoval, J., Tomilov, A., Sears, T., Woolard, K., Angelastro, J. M., & Cortopassi, G. A. (2020). Cetylpyridinium chloride is a potent AMP-activated kinase (AMPK) inducer and has therapeutic potential in cancer. *Mitochondrion*, 50, 19–24. <https://doi.org/10.1016/j.mito.2019.09.009>



- Cai, C., Zhu, J., Ye, L., Dai, Y., Fang, M., Hu, Y., Pan, S., Chen, S., Li, P., Fu, X., & Lin, Z. (2019). Glycine Protects against Hypoxic-Ischemic Brain Injury by Regulating Mitochondria-Mediated Autophagy via the AMPK Pathway. *Oxidative Medicine and Cellular Longevity*, 2019(1), 4248529. <https://doi.org/10.1155/2019/4248529>
- He, X.-X., Huang, C.-K., & Xie, B.-S. (2018). Autophagy inhibition enhanced 5-FU-induced cell death in human gastric carcinoma BGC-823 cells. *Molecular Medicine Reports*, 17(5), 6768–6776. <https://doi.org/10.3892/mmr.2018.8661>
- He, Z., Guo, L., Shu, Y., Fang, Q., Zhou, H., Liu, Y., Liu, D., Lu, L., Zhang, X., Ding, X., Liu, D., Tang, M., Kong, W., Sha, S., Li, H., Gao, X., & Chai, R. (2017). Autophagy protects auditory hair cells against neomycin-induced damage. *Autophagy*, 13(11), 1884–1904. <https://doi.org/10.1080/15548627.2017.1359449>
- Kaster, K. R., Burgett, S. G., & Ingolia, T. D. (1984). Hygromycin B resistance as dominant selectable marker in yeast. *Current Genetics*, 8(5), 353–358. <https://doi.org/10.1007/BF00419824>
- Kim, H.-S., Woo Chang, S., Baek, S.-H., Han, S. H., Lee, Y., Zhu, Q., & Kum, K.-Y. (2013). Antimicrobial effect of alexidine and chlorhexidine against *Enterococcus faecalis* infection. *International Journal of Oral Science*, 5(1), 26–31. <https://doi.org/10.1038/ijos.2013.11>
- Kwon, Y., Bang, Y., Moon, S.-H., Kim, A., & Choi, H. J. (2020). Amitriptyline interferes with autophagy-mediated clearance of protein aggregates via inhibiting autophagosome maturation in neuronal cells. *Cell Death & Disease*, 11(10), 1–17. <https://doi.org/10.1038/s41419-020-03085-6>
- Lee, C.-H., Kim, H. J., Lee, J.-H., Cho, H.-J., Kim, J., Chung, K. C., Jung, S., & Paik, S. R. (2006). Dequalinium-induced Protofibril Formation of  $\alpha$ -Synuclein \*. *Journal of Biological Chemistry*, 281(6), 3463–3472. <https://doi.org/10.1074/jbc.M505307200>
- Niture, S., Lin, M., Qi, Q., Moore, J. T., Levine, K. E., Fernando, R. A., & Kumar, D. (2021). Role of Autophagy in Cadmium-Induced Hepatotoxicity and Liver Diseases. *Journal of Toxicology*, 2021(1), 9564297. <https://doi.org/10.1155/2021/9564297>
- Pandey, N. K., Ghosh, S., & Dasgupta, S. (2013). Effect of surfactants on preformed fibrils of human serum albumin. *International Journal of Biological Macromolecules*, 59, 39–45. <https://doi.org/10.1016/j.ijbiomac.2013.04.014>

- Rajapakse, A. G., Ming, X.-F., Carvas, J. M., & Yang, Z. (2009). The hexosamine biosynthesis inhibitor azaserine prevents endothelial inflammation and dysfunction under hyperglycemic condition through antioxidant effects. *American Journal of Physiology-Heart and Circulatory Physiology*, 296(3), H815–H822. <https://doi.org/10.1152/ajpheart.00756.2008>
- Richie, D. L., Fuller, K. K., Fortwendel, J., Miley, M. D., McCarthy, J. W., Feldmesser, M., Rhodes, J. C., & Askew, D. S. (2007). Unexpected Link between Metal Ion Deficiency and Autophagy in *Aspergillus fumigatus*. *Eukaryotic Cell*, 6(12), 2437–2447. <https://doi.org/10.1128/ec.00224-07>
- Yue, Y.-L., Zhang, M.-Y., Liu, J.-Y., Fang, L.-J., & Qu, Y.-Q. (2022). The role of autophagy in idiopathic pulmonary fibrosis: From mechanisms to therapies. *Therapeutic Advances in Respiratory Disease*, 16, 17534666221140972. <https://doi.org/10.1177/17534666221140972>
- Zhang, X.-H., Zhang, N., Lu, J.-M., Kong, Q.-Z., & Zhao, Y.-F. (2012). Tetrazolium Violet Induced Apoptosis and Cell Cycle Arrest in Human Lung Cancer A549 Cells. *Biomolecules & Therapeutics*, 20(2), 177–182. <https://doi.org/10.4062/biomolther.2012.20.2.177>
